# Supplementary material for: Plasma Concentrations of Short-Chain Fatty Acids in Active and Recovered Anorexia Nervosa
Source: MDPI journal article supplement (doi:10.3390/nu14245247), 2022-12-09
Supplement: s1 [file s1]

**Supplementary figure legends:**

**Supplementary Figure S1.** Spearman correlation matrix of SCFA concentrations showing the correlation coefficients. Non-significant correlations (FDR-adjusted  $p \geq 0.05$ ) are indicated by a blank.
